# Supplementary material for: Do health preferences differ among Asian populations? A comparison of EQ-5D-5L discrete choice experiments data from 11 Asian studies
Source: Qual Life Res. 2022 Feb 18;31(7):2175–87. doi: 10.1007/s11136-021-03075-x (PMC9188617; doi:10.1007/s11136-021-03075-x)
Supplement: Supplementary file 1 — Supplementary file1 (xlsx 26 KB) [file 11136_2021_3075_MOESM1_ESM.xlsx]

## Sheet: Appendix 1
Appendix 1. Relative importance calculation
Article name: Do health preferences differ among Asian populations? A comparison of EQ-5D-5L Discrete Choice Experiments data from 11 Asian studies
Journal name: Quality of life research
Author names: Zhihao Yang, Fredrick Dermawan Purba, Asrul Akmal Shafie, Ataru Igarashi, Eliza Wong, Hilton Lam, Hoang Van Minh, Hsiang-Wen Lin, Jeonghoon Ahn, Juntana Pattanaphesaj, Min-Woo Jo, Vu Quynh Mai, Jan Busschbach, Nan Luo, Jie Jiang
Affiliation and e-mail address of the corresponding author: Jinan University, jiangjie218@126.om

## Sheet: dimension
Step 1. Take the mixed logit model coefficinets															Step 2. Calculate the summarized value for each level
		China	Indonesia	Japan	Korea	Malaysia	Singapore	Thailand	Philippine	Vietnam	Hongkong	Taiwan			China	Indonesia	Japan	Korea	Malaysia	Singapore	Thailand	Philippine	Vietnam	Hongkong	Taiwan
	MO2	-0.522126	-0.625412	-0.57186	-0.71091	-0.643034	-0.506618	-0.559607	-0.701643	-0.755368	-0.695777	-0.719576		(MO2+SC2+UA2+PD2+AD2)	-1.89427	-2.06867	-1.94307	-1.73849	-2.70584	-1.54503	-2.08087	-2.60948	-2.6953	-2.17913	-1.88549
	MO3	-0.902973	-1.03718	-0.712574	-0.923981	-1.00404	-0.678301	-0.590743	-0.629123	-0.84546	-1.07934	-1.08573		(MO3+SC3+UA3+PD3+AD3)	-3.3491	-3.32644	-2.85537	-2.52418	-3.66215	-2.27875	-2.51703	-2.80049	-3.8368	-3.39866	-3.4565
	MO4	-1.57937	-1.95975	-1.33584	-1.58412	-2.08739	-1.47912	-1.69429	-1.58172	-1.92287	-2.06183	-2.08861		(MO4+SC4+UA4+PD4+AD4)	-6.83877	-6.33556	-5.45496	-5.58669	-8.91849	-5.74519	-7.6782	-6.79138	-8.00638	-7.67921	-8.51013
	MO5	-2.36621	-3.13576	-1.97951	-3.07763	-3.08905	-2.19376	-3.30006	-2.25113	-3.36659	-3.00119	-2.99586		(MO5+SC5+UA5+PD5+AD5)	-9.49503	-9.06905	-8.14105	-9.31745	-12.2813	-7.95561	-11.9115	-8.10933	-12.5436	-9.87175	-12.1123
	SC2	-0.243144	-0.462598	-0.387453	-0.19437	-0.572558	-0.307643	-0.521048	-0.558692	-0.461243	-0.375918	-0.330371
	SC3	-0.523771	-0.652742	-0.509794	-0.258404	-0.720113	-0.526687	-0.534196	-0.607149	-0.449146	-0.502749	-0.586894
	SC4	-1.11892	-1.05704	-0.880931	-0.605997	-1.79778	-1.16245	-1.48954	-1.4378	-1.23164	-1.41112	-1.49065
	SC5	-1.53056	-1.54201	-1.25059	-1.06173	-2.16463	-1.49665	-2.00516	-1.60767	-1.96387	-1.7635	-1.94905
	UA2	-0.351869	-0.381806	-0.37587	-0.266135	-0.294018	-0.195056	-0.3117	-0.473875	-0.290349	-0.248281	-0.106324
	UA3	-0.449364	-0.65372	-0.505966	-0.337674	-0.375681	-0.285548	-0.378736	-0.473258	-0.411821	-0.433615	-0.291643
	UA4	-0.986319	-1.3908	-1.04082	-0.916916	-1.22049	-0.732351	-1.13032	-1.12781	-1.36838	-1.06359	-1.34008
	UA5	-1.64758	-1.79954	-1.45208	-1.62699	-1.5766	-0.951635	-2.01583	-1.40872	-2.42017	-1.40886	-1.87723
	PD2	-0.5207	-0.399176	-0.316016	-0.373522	-0.690506	-0.302192	-0.345426	-0.590201	-0.825202	-0.491074	-0.518451
	PD3	-0.758088	-0.448548	-0.503721	-0.576479	-0.788955	-0.334569	-0.389552	-0.624027	-1.3	-0.746119	-0.698487
	PD4	-1.66929	-0.875453	-1.04135	-1.45111	-1.9865	-1.18738	-1.50905	-1.56238	-2.10787	-1.64259	-1.83516
	PD5	-2.10112	-1.15124	-1.74654	-2.29141	-2.96504	-1.79831	-2.00673	-1.77656	-2.99171	-1.92996	-3.02158
	AD2	-0.256426	-0.19968	-0.291872	-0.193554	-0.505721	-0.23352	-0.343089	-0.285071	-0.363141	-0.368077	-0.210769
	AD3	-0.714907	-0.53425	-0.623313	-0.427638	-0.773366	-0.45364	-0.623807	-0.466934	-0.830374	-0.636834	-0.79375
	AD4	-1.48487	-1.05252	-1.15602	-1.02856	-1.82632	-1.18389	-1.855	-1.08167	-1.37562	-1.50008	-1.75564
	AD5	-1.84956	-1.4405	-1.71232	-1.2597	-2.48597	-1.51526	-2.58375	-1.06526	-1.80127	-1.76824	-2.26861
Step 3. Calculate the adjusted coefficients, e.g., for aUA2=UA2/(MO2+SC2+UA2+PD2+AD2)															Step 4. Calculate the relative importance for each dimension, e.g., PD=(aPD2+aPD3+aPD4+aPD5)/4
		China	Indonesia	Japan	Korea	Malaysia	Singapore	Thailand	Philippine	Vietnam	Hongkong	Taiwan			China	Indonesia	Japan	Korea	Malaysia	Singapore	Thailand	Philippine	Vietnam	Hongkong	Taiwan
	aMO2	0.275635	0.302325	0.294307	0.408924	0.237647	0.327902	0.268929	0.268882	0.280253	0.319292	0.381638		MO	0.25635	0.317304	0.257975	0.347209	0.249347	0.289692	0.250334	0.251007	0.252292	0.302346	0.297129
	aMO3	0.269616	0.311799	0.249556	0.366053	0.274166	0.297664	0.234698	0.224647	0.220355	0.317579	0.314111		SC	0.15239	0.18918	0.173262	0.109149	0.196518	0.205177	0.206241	0.210215	0.149647	0.170708	0.170272
	aMO4	0.230944	0.309325	0.244885	0.283552	0.234052	0.257453	0.220662	0.232901	0.240168	0.268495	0.245426		UA	0.159419	0.199759	0.184952	0.156401	0.119117	0.124662	0.154177	0.172592	0.144727	0.130685	0.113305
	aMO5	0.249205	0.345765	0.243152	0.330308	0.251525	0.27575	0.277047	0.277597	0.268391	0.304018	0.247339		PD	0.241654	0.148232	0.186121	0.237227	0.233698	0.193782	0.171443	0.224533	0.286691	0.213573	0.235539
	aSC2	0.128358	0.223621	0.199402	0.111804	0.211601	0.199118	0.250399	0.214101	0.171129	0.172508	0.175217		AD	0.190188	0.145525	0.19769	0.150014	0.201319	0.186687	0.217804	0.141652	0.166643	0.182688	0.183756
	aSC3	0.156391	0.196228	0.178539	0.102372	0.196637	0.23113	0.212232	0.216801	0.117063	0.147926	0.169794
	aSC4	0.163615	0.166842	0.161492	0.108472	0.201579	0.202334	0.193996	0.211709	0.153832	0.183759	0.175162
	aSC5	0.161196	0.170029	0.153615	0.113951	0.176254	0.188125	0.168337	0.198249	0.156564	0.178641	0.160915
	aUA2	0.185755	0.184566	0.193441	0.153084	0.108661	0.126247	0.149793	0.181597	0.107724	0.113936	0.0563906
	aUA3	0.134174	0.196522	0.177198	0.133776	0.102585	0.125309	0.150469	0.168991	0.107334	0.127584	0.0843752
	aUA4	0.144224	0.219523	0.190803	0.164125	0.136849	0.127472	0.147212	0.166065	0.170911	0.138502	0.157468
	aUA5	0.17352	0.198426	0.178366	0.174617	0.128374	0.119618	0.169234	0.173716	0.19294	0.142716	0.154985
	aPD2	0.274882	0.192963	0.162637	0.214854	0.255191	0.19559	0.166001	0.226175	0.306163	0.225354	0.274969
	aPD3	0.226356	0.134843	0.176412	0.228383	0.215435	0.146822	0.154766	0.222828	0.338824	0.219533	0.202079
	aPD4	0.244092	0.138181	0.1909	0.259744	0.22274	0.206675	0.196537	0.230054	0.263274	0.213901	0.215644
	aPD5	0.221286	0.126942	0.214535	0.245927	0.241427	0.226043	0.168469	0.219076	0.238505	0.195503	0.249463
	aAD2	0.135369	0.0965258	0.150212	0.111334	0.1869	0.151143	0.164878	0.109244	0.134731	0.16891	0.111785
	aAD3	0.213462	0.160607	0.218295	0.169417	0.211178	0.199075	0.247834	0.166733	0.216424	0.187378	0.22964
	aAD4	0.217126	0.166129	0.21192	0.184108	0.20478	0.206067	0.241594	0.159271	0.171815	0.195342	0.2063
	aAD5	0.194793	0.158837	0.210332	0.135198	0.202419	0.190464	0.216912	0.131362	0.1436	0.179122	0.187297
						r

## Sheet: level
Step 1. Take the mixed logit model coefficinets														Step 2. Caculate the summarzied value for each level (MO2+SC2+UA2+PD2+AD2)
		China	Indonesia	Japan	Korea	Malaysia	Singapore	Thailand	Philippine	Vietnam	Hongkong	Taiwan			China	Indonesia	Japan	Korea	Malaysia	Singapore	Thailand	Philippine	Vietnam	Hongkong	Taiwan
	MO2	-0.522126	-0.625412	-0.57186	-0.71091	-0.643034	-0.506618	-0.559607	-0.701643	-0.755368	-0.695777	-0.719576		(MO2+SC2+UA2+PD2+AD2)	-1.89427	-2.06867	-1.94307	-1.73849	-2.70584	-1.54503	-2.08087	-2.60948	-2.6953	-2.17913	-1.88549
	MO3	-0.902973	-1.03718	-0.712574	-0.923981	-1.00404	-0.678301	-0.590743	-0.629123	-0.84546	-1.07934	-1.08573		(MO3+SC3+UA3+PD3+AD3)	-3.3491	-3.32644	-2.85537	-2.52418	-3.66215	-2.27875	-2.51703	-2.80049	-3.8368	-3.39866	-3.4565
	MO4	-1.57937	-1.95975	-1.33584	-1.58412	-2.08739	-1.47912	-1.69429	-1.58172	-1.92287	-2.06183	-2.08861		(MO4+SC4+UA4+PD4+AD4)	-6.83877	-6.33556	-5.45496	-5.58669	-8.91849	-5.74519	-7.6782	-6.79138	-8.00638	-7.67921	-8.51013
	MO5	-2.36621	-3.13576	-1.97951	-3.07763	-3.08905	-2.19376	-3.30006	-2.25113	-3.36659	-3.00119	-2.99586		(MO5+SC5+UA5+PD5+AD5)	-9.49503	-9.06905	-8.14105	-9.31745	-12.2813	-7.95561	-11.9115	-8.10933	-12.5436	-9.87175	-12.1123
	SC2	-0.243144	-0.462598	-0.387453	-0.19437	-0.572558	-0.307643	-0.521048	-0.558692	-0.461243	-0.375918	-0.330371
	SC3	-0.523771	-0.652742	-0.509794	-0.258404	-0.720113	-0.526687	-0.534196	-0.607149	-0.449146	-0.502749	-0.586894
	SC4	-1.11892	-1.05704	-0.880931	-0.605997	-1.79778	-1.16245	-1.48954	-1.4378	-1.23164	-1.41112	-1.49065
	SC5	-1.53056	-1.54201	-1.25059	-1.06173	-2.16463	-1.49665	-2.00516	-1.60767	-1.96387	-1.7635	-1.94905
	UA2	-0.351869	-0.381806	-0.37587	-0.266135	-0.294018	-0.195056	-0.3117	-0.473875	-0.290349	-0.248281	-0.106324
	UA3	-0.449364	-0.65372	-0.505966	-0.337674	-0.375681	-0.285548	-0.378736	-0.473258	-0.411821	-0.433615	-0.291643
	UA4	-0.986319	-1.3908	-1.04082	-0.916916	-1.22049	-0.732351	-1.13032	-1.12781	-1.36838	-1.06359	-1.34008
	UA5	-1.64758	-1.79954	-1.45208	-1.62699	-1.5766	-0.951635	-2.01583	-1.40872	-2.42017	-1.40886	-1.87723
	PD2	-0.5207	-0.399176	-0.316016	-0.373522	-0.690506	-0.302192	-0.345426	-0.590201	-0.825202	-0.491074	-0.518451
	PD3	-0.758088	-0.448548	-0.503721	-0.576479	-0.788955	-0.334569	-0.389552	-0.624027	-1.3	-0.746119	-0.698487
	PD4	-1.66929	-0.875453	-1.04135	-1.45111	-1.9865	-1.18738	-1.50905	-1.56238	-2.10787	-1.64259	-1.83516
	PD5	-2.10112	-1.15124	-1.74654	-2.29141	-2.96504	-1.79831	-2.00673	-1.77656	-2.99171	-1.92996	-3.02158
	AD2	-0.256426	-0.19968	-0.291872	-0.193554	-0.505721	-0.23352	-0.343089	-0.285071	-0.363141	-0.368077	-0.210769
	AD3	-0.714907	-0.53425	-0.623313	-0.427638	-0.773366	-0.45364	-0.623807	-0.466934	-0.830374	-0.636834	-0.79375
	AD4	-1.48487	-1.05252	-1.15602	-1.02856	-1.82632	-1.18389	-1.855	-1.08167	-1.37562	-1.50008	-1.75564
	AD5	-1.84956	-1.4405	-1.71232	-1.2597	-2.48597	-1.51526	-2.58375	-1.06526	-1.80127	-1.76824	-2.26861
Step 3. Calculate relative importane of levels, e.g., L2=(MO2+SC2+UA2+PD2+AD2)/ (MO5+SC5+UA5+PD5+AD5)
	China	Indonesia	Japan	Korea	Malaysia	Singapore	Thailand	Philippines	Vietnam	Hongkong	Taiwan
L2	0.199501	0.228102	0.238676	0.186584	0.220322	0.194206	0.174694	0.321788	0.214875	0.220744	0.155667
L3	0.352722	0.36679	0.350737	0.270909	0.29819	0.286433	0.211311	0.345342	0.305877	0.344281	0.28537
L4	0.720248	0.698592	0.670057	0.599595	0.726186	0.722156	0.644602	0.837477	0.638283	0.777897	0.702601
L5	1	1	1	1	1	1	1	1	1	1	1
