# Supplementary material for: Do health preferences differ among Asian populations? A comparison of EQ-5D-5L discrete choice experiments data from 11 Asian studies
Source: Qual Life Res. 2022 Feb 18;31(7):2175–87. doi: 10.1007/s11136-021-03075-x (PMC9188617; doi:10.1007/s11136-021-03075-x)
Supplement: Supplementary file 3 — Supplementary file3 (docx 23 KB) [file 11136_2021_3075_MOESM3_ESM.docx]

Appendix 3. An example of testing coefficients difference using mixed logit model: China vs Indonesia

Article name: Do health preferences differ among Asian populations? A comparison of EQ-5D-5L Discrete Choice Experiments data from 11 Asian studies

Journal name: Quality of life research

Author names: Zhihao Yang, Fredrick Dermawan Purba, Asrul Akmal Shafie, Ataru Igarashi, Eliza Wong, Hilton Lam, Hoang Van Minh, Hsiang-Wen Lin, Jeonghoon Ahn, Juntana Pattanaphesaj, Min-Woo Jo, Vu Quynh Mai, Jan Busschbach, Nan Luo, Jie Jiang

Affiliation and e-mail address of the corresponding author: Jinan University, jiangjie218@126.om

| Main effects | Coefficients, SE | SD coefficients, SE | Main effects*study dummy | Coefficients, SE |
| --- | --- | --- | --- | --- |
| mo2 | -0.519,0.058 | **0.060**,0.168 | mo2*Indonesia | **-0.093**,0.086 |
| mo3 | -0.913,0.074 | 0.353,0.132 | mo3*Indonesia | **-0.072**,0.105 |
| mo4 | -1.552,0.078 | 0.403,0.138 | mo4*Indonesia | -0.339,0.108 |
| mo5 | -2.356,0.100 | 1.118,0.097 | mo5*Indonesia | -0.634,0.132 |
| sc2 | -0.219,0.064 | **0.023**,0.161 | sc2*Indonesia | -0.242,0.095 |
| sc3 | -0.491,0.072 | 0.317,0.142 | sc3*Indonesia | **-0.172**,0.106 |
| sc4 | -1.089,0.076 | -0.358,0.179 | sc4*Indonesia | **0.061**,0.108 |
| sc5 | -1.479,0.078 | 0.550,0.103 | sc5*Indonesia | **-0.021**,0.107 |
| ua2 | -0.350,0.062 | **0.153**,0.171 | ua2*Indonesia | **-0.044**,0.092 |
| ua3 | -0.450,0.070 | **0.155**,0.137 | ua3*Indonesia | **-0.205**,0.105 |
| ua4 | -0.965,0.074 | 0.418,0.127 | ua4*Indonesia | -0.374,0.106 |
| ua5 | -1.618,0.081 | 0.712,0.090 | ua5*Indonesia | **-0.134**,0.111 |
| pd2 | -0.518,0.065 | **-0.101**,0.147 | pd2*Indonesia | **0.165**,0.095 |
| pd3 | -0.742,0.070 | **0.000**,0.132 | pd3*Indonesia | 0.325,0.101 |
| pd4 | -1.675,0.080 | 0.459,0.119 | pd4*Indonesia | 0.864,0.108 |
| pd5 | -2.059,0.088 | -0.632,0.120 | pd5*Indonesia | 0.974,0.112 |
| ad2 | -0.230,0.069 | 0.439,0.105 | ad2*Indonesia | **0.011**,0.101 |
| ad3 | -0.691,0.069 | **0.157**,0.110 | ad3*Indonesia | **0.185**,0.101 |
| ad4 | -1.453,0.080 | **-0.296**,0.161 | ad4*Indonesia | 0.424,0.108 |
| ad5 | -1.837,0.087 | -0.659,0.106 | ad5*Indonesia | 0.421,0.116 |
| Number of observations 32,956  Log-likelihood -8587.43 | | | | |  |

*Bold font: not significant at 0.05 level

Appendix 3 shows the pooled modeling of China and Indonesia. The fourth column shows the additional 20 parameters representing the differences between China’s and Indonesia’s modelling results. For example, for mobility, the 4th and 5th levels are significant at 0.05 level and suggests the Indonesian population attached larger disutility to the 4th (0.339) and 5th (0.634) level problems compared with the Chinese population.
